# Supplementary material for: Opposing JAK-STAT and Wnt signaling gradients define a stem cell domain by regulating differentiation at two borders
Source: eLife. 2020 Nov 2;9:e61204. doi: 10.7554/eLife.61204 (PMC7695452; doi:10.7554/eLife.61204)
Supplement: Figure 1—source data 1. [file elife-61204-fig1-data1.xlsx]

## Sheet: 1G
Number of FSCs	0d %	6d %	12d %		0d err	6d err	12d err
0	0.0360723	0.328435	0.39899		0.000480011	0.0118717	0.0123039
1	0.13319	0.123962	0.127525		0.000921912	0.00833006	0.00838102
2	0.230521	0.0958466	0.0915404		0.00121226	0.00744136	0.00724572
3	0.248254	0.0709265	0.0536616		0.00125791	0.00648892	0.0056621
4	0.18619	0.0875399	0.0555556		0.00108972	0.00714419	0.00575538
5	0.103121	0.0600639	0.0416667		0.000811319	0.00600619	0.00502083
6	0.043628	0.0690096	0.0271465		0.000527875	0.00640723	0.00408322
7	0.0143829	0.0408946	0.042298		0.000303134	0.00500621	0.00505705
≥8	0.00464088	0.123323	0.161616		0.0001722	0.00833006	0.010381
(0d% is a binomial distribution, centered around 3.25)
