# Supplementary material for: Opposing JAK-STAT and Wnt signaling gradients define a stem cell domain by regulating differentiation at two borders
Source: eLife. 2020 Nov 2;9:e61204. doi: 10.7554/eLife.61204 (PMC7695452; doi:10.7554/eLife.61204)
Supplement: Figure 2—source data 1. [file elife-61204-fig2-data1.xlsx]

## Sheet: 2A
	Control	stat	UAS-Hop		SEM:		Con	stat	UAS-Hop
EC	0	0	0.123515			EC	0	0	0.00886034
Layer 3	0.0816327	0	0.321138			Layer 3	0.00396881	0	0.0125735
Layer 2	0.200135	0.0145985	0.398458			Layer 2	0.00580271	0.00654322	0.0131838
Layer 1	0.3336	0.0652174	0.498656			Layer 1	0.00683999	0.01347	0.0134644
Avg EdU FSCs	0.250734	0.0238095	0.438724
Normalized Avg	0.250734	0.038781	0.438361
n ECs	1612	52	421		p-value:	EC			<0.0001
n L3 FSCs	784	107	246		(EdU ratio	Layer 3		<0.0001	<0.0001
n L2 FSCs	1479	137	389		vs. con)	Layer 2		<0.0001	<0.0001
n L1 FSCs	2503	92	744			Layer 1		<0.0001	<0.0001
Total FSCs	4766	336	1379
EdU+ EC	0	0	52
EdU+ L3	64	0	79
EdU+ L2	296	2	155
EdU+ L1	835	6	371
EdU index vs. avg
Layer 3	0.325574	0.0126261	0.142719		p-value	Layer 3	--	0.2364	<0.0001
Layer 2	0.798196	0.0309549	0.349898		Expected vs.	Layer 2	--	0.3251	0.0811
Layer 1	1.33049	0.0515978	0.583235		observed	Layer 1	--	0.6278	0.0002

## Sheet: 2F
	EC	Layer 3	Layer 2	Layer 1	FC
Control	0.127811	0.30314	0.491725	0.678364	1
c587>Hop	0.709831	1.05065	1.08567	1.08901	1
SEM Control	0.0142584	0.0305773	0.0456373	0.0554961
SEM Hop	0.045234	0.0622548	0.0733828	0.0740565

## Sheet: 2J
	Control	C587>Hop	C587>CycE		SEM		Control	UAS-Hop	UAS-CycE
EC	0	0.103571	0			EC	0	0.0129962	0
Layer 3	0.126761	0.411215	0.361345			Layer 3	0.0132238	0.0252882	0.0199643
Layer 2	0.282051	0.373737	0.524324			Layer 2	0.0178858	0.0249218	0.0207547
Layer 1	0.393178	0.382423	0.614545			Layer 1	0.0194144	0.0251499	0.0202267
Avg FSC EdU	0.307761	0.386266	0.533679
Normalized Avg	0.307761	0.385174	0.538186
n EC	1876	1400	728
n L3 FSC	213	214	119
n L2 FSC	351	297	185
n L1 FSC	557	421	275
Total FSCs	1121	932	579
EdU+ EC	0	145	0
EdU+ L3	27	88	43
EdU+ L2	99	111	97
EdU+ L1	219	161	169
Total EdU	345	360	309
EdU index vs. avg
Layer 3	0.41188	0.158645	0.221668		p-value	Layer 3	--	<0.0001	0.0013
Layer 2	0.916462	0.352997	0.493227		Expected vs.	Layer 2	--	0.5127	0.4661
Layer 1	1.27754	0.492076	0.687555		observed	Layer 1	--	0.0002	0.0359

## Sheet: 2K
EdU %s	UAS-CycE	kibra	wts	UAS-CycE stat	kibra stat	wts stat	kibra UAS-CycE stat			SEM	UAS-CycE	kibra	wts	UAS-CycE stat	kibra stat	wts stat	kibra UAS-CycE stat
Layer 3	0.129032	0.0810811	0.0895522	0.0263158	0.00840336	0	0.0217391			Layer 3	0.0241308	0.0156553	0.0144588	0.0162529	0.00425151	0	0.00918646
Layer 2	0.350877	0.176471	0.185185	0.03125	0.0497238	0.0116279	0.117647			Layer 2	0.0343528	0.0218645	0.0196698	0.0176663	0.0101241	0.00702317	0.020296
Layer 1	0.514286	0.335165	0.297872	0.111111	0.0745342	0.1	0.239669			Layer 1	0.0359761	0.0270738	0.0231575	0.0319093	0.0122323	0.0196537	0.026891
Average EdU	0.404145	0.259868	0.223077	0.0515464	0.0477223	0.0515021	0.15873
Normalized Avg	0.400203	0.244122	0.228635	0.0723797	0.0559565	0.0561262	0.165954
										p-value, each layer vs. control
	UAS-CycE	kibra	wts	UAS-CycE stat	kibra stat	wts stat	kibra UAS-CycE stat	Control		Layer 3	0.35238	0.98404	0.78716	0.2113	0.00362	0.03515	0.07078
n Layer 3	31	37	67	38	119	37	46	784		Layer 2	0.0056	0.5892	0.67448	0.01732	< .00001	< .00001	0.03216
n Layer 2	57	85	135	32	181	86	85	1479		Layer 1	0.00014	0.97606	0.3125	0.01428	< .00001	< .00001	0.03156
n Layer 1	105	182	188	27	161	110	121	2503
	193	304	390	97	461	233	252	4766
										p-value, comparison of layers
EdU+ Layer 3	4	3	6	1	1	0	1	64
EdU+ Layer 2	20	15	25	1	9	1	10	296		L3 vs L2				0.9007	0.0478	0.5051	0.0495
EdU+ Layer 1	54	61	56	3	12	11	29	835		L2 vs L1				0.2267	0.3385	0.0111	0.0283
total EdU	78	79	87	5	22	12	40	1195
EdU index vs. avg										p-value of EdU Expected vs. Observed
Layer 3	0.130296	0.0794798	0.0744375	0.023565	0.018218	0.0182733	0.0540303	0.325574		Layer 3	0.9841	0.9747	0.6579	0.9353	0.4311	0.4077	0.3563
Layer 2	0.31944	0.194857	0.182495	0.0577732	0.0446643	0.0447998	0.132464	0.798196		Layer 2	0.6555	0.6954	0.9484	0.5522	0.7736	0.1633	0.7304
Layer 1	0.532466	0.324802	0.304196	0.0963004	0.0744496	0.0746754	0.2208	1.33049		Layer 1	0.7604	0.817	0.8792	0.8221	0.9801	0.4281	0.679
