# Supplementary material for: Opposing JAK-STAT and Wnt signaling gradients define a stem cell domain by regulating differentiation at two borders
Source: eLife. 2020 Nov 2;9:e61204. doi: 10.7554/eLife.61204 (PMC7695452; doi:10.7554/eLife.61204)
Supplement: Figure 3—source data 1. [file elife-61204-fig3-data1.xlsx]

## Sheet: 3A
	Control	cycE	cutlet	stat	kibra/wts/UAS-CycE stat	kibra UAS-CycE stat	UAS-Hop	kibra	UAS-CycE
Layer 3 %	0.197008	0.307692	0.166667	0.705882	0.276869	0.292162	0.203612	0.121597	0.166134
Layer 2 %	0.315424	0.282051	0.4	0.258824	0.426402	0.34323	0.305829	0.315789	0.306709
Layer 1 %	0.487568	0.410256	0.433333	0.0352941	0.296729	0.364608	0.490558	0.562613	0.527157
err 3	0.00577343	0.0739053	0.0481125	0.0494217	0.0152936	0.0156719	0.00815879	0.013923	0.021038
err 2	0.00674519	0.0720574	0.0632456	0.0475065	0.0169035	0.0163623	0.00933542	0.0198024	0.0260645
err 1	0.00725558	0.0787639	0.0639734	0.0200142	0.0156137	0.0165874	0.0101287	0.021133	0.02822
n-values
Layer 3	935	12	10	60	237	246	496	67	52
Layer 2	1497	11	24	22	365	289	745	174	96
Layer 1	2314	16	26	3	254	307	1195	310	165
Total	4746	39	60	85	856	842	2436	551	313
P - layer 3		0.0832	0.5613	<0.0001	<0.0001	<0.0001	0.4821	<0.0001	0.1801
P - layer 2		0.6586	0.37886	0.1594	<0.0001	0.3205	0.4358	0.9619	0.7678
P - layer 1		0.3318	0.397	<0.0001	<0.0001	<0.0001	0.8097	0.00086	0.1813
(p values vs. control)

## Sheet: 3B
	Control	stat	UAS-Dap UAS-Hop
EC/aFSC 6d	0.55	0.87	0.44
stdev	0.29688	0.441976	0.228918
n	1148	175	61
err	0.0509144	0.0334102	0.080493
p vs. control		p < 0.0001	0.0063
EC/aFSC 12d	0.63	1.19	1.96
stdev	0.32601	1.12513	1.8565
n	1044	68	56
err	0.0559103	0.136442	0.248085
p vs. control		P < 0.0001	P < 0.0001

## Sheet: 3C
	Control	stat	kibra/wts/UAS-CycE stat	kibra UAS-CycE stat	kibra UAS-CycE stat UAS-Fas3	UAS-Hop	UAS-Dap UAS-Hop
FC %	0.616	0.342	0.2531	0.228	0.454	0.780539	0.7667
n (germaria)	556	84	153	28	20	59	38
err	0.0206262	0.0517591	0.0351505	0.0792861	0.111329	0.0538828	0.0686086
p value (vs con)		< 0.00001	< 0.00001	< 0.00001	0.1443	0.01242	0.0648
				0.04947
				(p value between genotypes)

## Sheet: 3H
	Control	stat	cycE	kibra/wts/ UAS-CycE stat	kibra UAS-CycE stat	kibra UAS-CycE stat UAS-Fas3	UAS-Hop	UAS-Dap UAS-Hop	UAS-CycE
# FSC	3.3	0.3	0.5	2.1	15.9	2.4	10.4	5.5	5.6
Avg EdU (%)	25	2.4	4.44248	4.93	15.87	13.06	43.9	23.509	40.4
% w FSC	0.621	0.253	0.2927	0.685	0.94	0.5686	0.752	0.583333	0.6429
% w FSC FC	0.428	0.035	0.0854	0.095	0.17	0.3137	0.687	0.520833	0.4464
SD FSC#	0.804256	0.608813	0.864242	2.05554	10.9152	4.01585	9.45111	0.583333	6.3354
SEM FSC#	0.0210845	0.0379767	0.0954395	0.102015	1.49931	0.562332	0.613916	0.520833	0.846604
EdU err	1.13519	0.91628	2.17182	1.06145	4.97241	4.76537	3.22359	4.32799	6.93951
12d n	1455	257	82	406	53	51	237	96	56
Error of % w FSC	1.27184	2.71178	5.02466	2.30535	3.26213	6.93519	2.80518	5.03173	6.40284
Error of % w FSC FC	1.29714	1.14639	3.0863	1.4552	5.15971	6.49724	3.01215	5.09867	6.64303
p value # FSC vs con		< 0.001	< 0.001	< 0.001	< 0.001	0.118	< 0.001	<0.0001	0.009
