# Supplementary material for: Opposing JAK-STAT and Wnt signaling gradients define a stem cell domain by regulating differentiation at two borders
Source: eLife. 2020 Nov 2;9:e61204. doi: 10.7554/eLife.61204 (PMC7695452; doi:10.7554/eLife.61204)
Supplement: Figure 4—source data 1. [file elife-61204-fig4-data1.xlsx]

## Sheet: 4A
	Control	UAS-dnTCF	arr	axn/apc	axn UAS-CycE		Std Error	Control	UAS-dnTCF	arr	axn/apc	axn UAS-CycE
Layer 3	0.197008	0.151304	0.0464135	0.465608	0.368327		Layer 3	0.577343	1.4944	1.36656	3.62835	2.03467
Layer 2	0.315424	0.21913	0.160338	0.328042	0.320285		Layer 2	0.674519	1.72507	2.38339	3.41511	1.96817
Layer 1	0.487568	0.629565	0.793249	0.206349	0.311388		Layer 1	0.725558	2.01392	2.6306	2.94364	1.9533
n values							p-value (layer % vs. control)
Layer 3	935	87	11	88	207		Layer 3		0.2983	0.2077	<0.0001	<0.0001
Layer 2	1497	126	38	62	180		Layer 2		0.0244	0.0414	0.8887	0.8966
Layer 1	2314	362	188	39	175		Layer 1		< 0.0001	< 0.0001	<0.0001	< 0.0001
Total FSC	4746	575	237	189	562

## Sheet: 4B
	Control	UAS- dnTCF	arr	axn/apc
FC %	0.616	0.528809	0.769	0.223923
n	556	103	71	67
std error	2.06262	4.91846	5.00196	5.09289
p value		0.0969	.0117	<.0001
(FC % vs. control)

## Sheet: 4C
EC/FSC 6d	EC/FSC 12d				6d	12d
0.192308	0.364157			min	0.192308	0.183663
0.236559	0.373482			1q	0.33658	0.372401
0.405797	0.673578			median	0.457738	0.567358
0.540541	0.449968			3q	0.61456	0.712687
0.420561	0.57217			max	1.10843	1.25976
0.893617	0.337579			outlier	1.41	1.65
0.376471	0.419367
0.405063	0.183663
0.337662	0.696035
0.2125	0.712558
0.614286	0.61109
0.575472	0.369159
0.244444	0.444774
0.195122	0.229478
0.259259	0.305642
0.333333	0.37611
0.482143	0.278118
1.10843	1.25976
0.775862	0.788503
0.615385	0.258487
0.557692	0.427393
0.433333	0.644139
0.91954	0.562546
0.305556	0.64109
0.349206	0.753336
0.633028	0.891442
1.04651	0.943941
0.426471	1.00467
0.5	0.855351
0.901408	0.713072
0.56	0.528791
0.5	0.63348

## Sheet: 4D
Genotype	Control	UAS-dnTCF	arr	arr UAS-DIAP1	UAS-DIAP1	axn/apc
EC/FSC 6d	0.55	0.66	0.3	0.39	0.67	2.01
n 6d	1148	184	91	83	91	136
EC/FSC 12d	0.63	0.22	0.11	0.21	0.78	7.27
n 12d	1044	132	68	53	85	61
stdev 6d	0.29688	0.426239	0.361463	0.545921	1.36091	0.698869
stdev 12d	0.32601	0.211227	0.120255	0.412629	0.509207	3.92748
std err 6d	0.00876213	0.0314228	0.0378917	0.0599226	0.142662	0.0599276
std err 12d	0.0100898	0.018385	0.014583	0.0566789	0.0552313	0.502862
p-value vs. con, 6d		P < 0.0001	P < 0.0001	P < 0.0001	P = 0.018	P < 0.0001
p-value vs. con, 12d		P < 0.0001	P < 0.0001	P < 0.0001	P = 0.0001	P < 0.0001

## Sheet: 4E
	Control	UAS-dnTCF	arr	arr DIAP1	axn/apc	axn CycE		SEM	Control	UAS-dnTCF	arr	arr DIAP1	axn/apc	axn CycE
Layer 3	0.0816327	0.0540541	0.04	0	0.0282486	0.0724638		Layer 3	0.00396339	0.00862718	0.0105045	0	0.00676959	0.0191646
Layer 2	0.200135	0.151515	0.152778	0.117647	0.047619	0.180556		Layer 2	0.00579479	0.0136795	0.0192859	0.027833	0.00870126	0.0284341
Layer 1	0.3336	0.248677	0.262948	0.263415	0.136792	0.238095		Layer 1	0.00683065	0.0164912	0.023599	0.0380521	0.0140403	0.0314847
Avg FSC EdU	0.250734	0.189229	0.224138	0.223881	0.0734558	0.153005
Normalized Avg	0.250734	0.18651	0.192085	0.174848	0.0912646	0.192993
								p-value EdU % by layer vs. control
n FSCs L3	784	111	25	12	177	69		Layer 3		0.30302	0.44726	0.3011	0.01208	0.77182
n FSCs L2	1479	198	72	51	210	72		Layer 2		0.1096	0.32708	0.1481	<0.00001	0.69654
n FSCs L1	2503	378	251	205	212	42		Layer 1		0.001	0.0226	0.0375	<0.00001	0.1902
Total FSCs	4766	687	348	268	599	183
EdU+ L3	64	6	1	0	5	5
EdU+ L2	296	30	11	6	10	13
EdU+ L1	835	94	66	54	29	10
Total EdU	1195	130	78	60	44	28
EdU index vs. avg		Expected EdU Values						p-value EdU Expected vs. Observed
Layer 3	0.325574	0.060723	0.062538	0.0569261	0.0297134	0.0628336		Layer 3	--	0.7825	0.6502	0.3963	0.9063	0.7925
Layer 2	0.798196	0.148872	0.153322	0.139563	0.072847	0.154046		Layer 2	--	0.9142	0.9949	0.6806	0.2144	0.5987
Layer 1	1.33049	0.24815	0.255567	0.232634	0.121427	0.256776		Layer 1	--	0.9769	0.8384	0.4472	0.5559	0.801
			0.19075

## Sheet: 4H
	EC	Layer 3	Layer 2	Layer 1	FC
Control	5.14901	4.07028	3.63083	2.96748	1
C587>dnTCF	2.2445	1.8162	1.92505	1.96406	1
SEM Control	0.211802	0.185742	0.146411	0.162637
SEM TCF	0.161899	0.15071	0.165371	0.125159

## Sheet: 4I
	Control	c587>dnTCF		err	Control	c587>dnTCF
Layer 3	0.169643	0.198276		Layer 3	0.0162721	0.0169852
Layer 2	0.339286	0.350575		Layer 2	0.0205274	0.0203273
Layer 1	0.480159	0.478927		Layer 1	0.0216607	0.0212818
Avg EdU	0.370301	0.37931
Normalized Avg	0.370301	0.37931
n Layer 3	112	116
n Layer 2	168	174
n Layer 1	252	261
Total FSC	532	551
EdU+ L3	19	23
EdU+ L2	57	61
EdU+ L1	121	125
	197	209
EdU vs. Avg		Expected		p-value	Expected vs. Observed
Layer 3	0.458122	0.17377		Layer 3		0.5395
Layer 2	0.916244	0.347541		Layer 2		0.9423
Layer 1	1.29667	0.491841		Layer 1		0.7294
