# Supplementary material for: Opposing JAK-STAT and Wnt signaling gradients define a stem cell domain by regulating differentiation at two borders
Source: eLife. 2020 Nov 2;9:e61204. doi: 10.7554/eLife.61204 (PMC7695452; doi:10.7554/eLife.61204)
Supplement: Figure 5—figure supplement 1—source data 1. [file elife-61204-fig5-figsupp1-data1.xlsx]

## Sheet: 5S1A
Genotype	Avg Intensity Clone	Avg Intensity Neighbor	% Change, Fz3-RFP (Clone/Neighbor)	n (Clones)	SEM of % Change	p value, clone vs. neighbor
Control	40	42.09	0.950344	26	7.31034	0.7963
stat	14.752	34.792	0.424005	31	8.87593	< 0.0001
kibra stat CycE	13.17	31.74	0.414934	26	9.66285	0.0002
UAS-Hop	46.0584	22.5584	2.04174	23	21.2866	0.0285
UAS-dnTCF	44.44	41.09	1.08153	40	17.1005	0.6417
axn CycE	38.63	37.402	1.03283	40	16.3305	0.8207
