# Supplementary material for: Opposing JAK-STAT and Wnt signaling gradients define a stem cell domain by regulating differentiation at two borders
Source: eLife. 2020 Nov 2;9:e61204. doi: 10.7554/eLife.61204 (PMC7695452; doi:10.7554/eLife.61204)
Supplement: Figure 5—figure supplement 2—source data 1. [file elife-61204-fig5-figsupp2-data1.xlsx]

## Sheet: 5S2A
Genotype	Avg Intensity Clone	Avg Intensity Neighbor	% Change, Fz3-RFP (Clone vs. neighbor)	n (Clones)	SEM of % Change	p value, Clone vs. Neighbor
UAS-dnTCF	8.57	13.57	0.63154	28	0.0704839	0.0121
arr	5.58	14.18	0.393512	22	0.051038	0.0015
axn	449.69	265.49	1.69381	32	0.298552	0.0227
stat	50.23	46.35	1.08371	26	0.204505	0.7349
kibra stat CycE	43.22	41.77	1.03471	32	0.0425582	0.7354
UAS-Hop	23.38	27.58	0.847716	28	0.069973	0.412
