# Supplementary material for: Opposing JAK-STAT and Wnt signaling gradients define a stem cell domain by regulating differentiation at two borders
Source: eLife. 2020 Nov 2;9:e61204. doi: 10.7554/eLife.61204 (PMC7695452; doi:10.7554/eLife.61204)
Supplement: Figure 5—figure supplement 3—source data 1. [file elife-61204-fig5-figsupp3-data1.xlsx]

## Sheet: 5S3D
	Control	UAS-Hop	axn UAS-Hop	(22C)	SEM
EC	0	0.0888889	0.133956		EC		2.99977	1.90107
Layer 3	0.025	0.267606	0.224576		Layer 3	0.396339	2.43704	1.44327
Layer 2	0.137931	0.326316	0.269504		Layer 2	0.579479	2.58101	1.53458
Layer 1	0.298851	0.402439	0.336478		Layer 1	0.683065	2.69951	1.63419
Avg FSC EdU	0.189189	0.351515	0.282297
					p-values, EdU % by layer vs. control
n ECs	65	90	321		EC		<0.0001	<0.0001
n Layer 3	40	71	236		Layer 3		<0.0001	<0.0001
n Layer 2	58	95	282		Layer 2		0.0098	0.0346
n Layer 1	87	164	318		Layer 1		0.1059	0.5092
Total FSCs	185	330	836
EdU EC	0	8	43
EdU+ L3	1	19	53
EdU+ L2	8	31	76
EdU+ L1	26	66	107
Total EdU FSCs	35	116	236
