# Supplementary material for: Opposing JAK-STAT and Wnt signaling gradients define a stem cell domain by regulating differentiation at two borders
Source: eLife. 2020 Nov 2;9:e61204. doi: 10.7554/eLife.61204 (PMC7695452; doi:10.7554/eLife.61204)
Supplement: Figure 5—source data 1. [file elife-61204-fig5-data1.xlsx]

## Sheet: 5A
	Control	stat	stat UAS-dnTCF	kibra/wts/UAS-CycE stat	kibra/wts/UAS-CycE stat UAS-dnTCF	kibra stat UAS-CycE	kibra stat UAS-CycE UAS-dnTCF		SEM	stat	stat UAS-dnTCF	kibra/wts/UAS-CycE stat	kibra/wts/UAS-CycE stat UAS-dnTCF	kibra stat UAS-CycE	kibra stat UAS-CycE UAS-dnTCF
Layer 3	0.0815105	0	0	0.0103093	0.0546875	0.0217391	0.106061		Layer 3	0	0	0.35915	0.90087	0.918646	1.58165
Layer 2	0.200067	0.0145985	0.0166667	0.056701	0.143478	0.117647	0.139344		Layer 2	0.654322	0.95686	0.822303	1.38897	2.0296	1.77885
Layer 1	0.333781	0.0652174	0.102941	0.0869565	0.225806	0.239669	0.303665		Layer 1	1.347	2.27132	1.00186	1.65662	2.6891	2.36204
Avg FSC EdU	0.250734	0.0238095	0.0446927	0.0493047	0.161695	0.15873	0.216359
Normalized Avg	0.250788	0.038781	0.0592345	0.0649592	0.172109	0.165954	0.220167
									p-value, EdU by layer - with or without UAS-dnTCF
n Layer 3	784	107	51	194	128	46	66		Layer 3		1		0.0166		0.0911
n Layer 2	1479	137	60	299	230	85	122		Layer 2		0.9172		0.0008		0.6597
n Layer 1	2503	92	68	298	279	121	191		Layer 1		0.3857		<0.0001		0.2202
Total FSCs	4766	336	179	791	637	252	379
EdU+ L3	64	0	0	2	7	1	7
EdU+ L2	296	2	1	11	33	10	17
EdU+ L1	835	6	7	26	63	29	58
EdU vs. Avg ratios		Expected EdU							p-value, EdU Expected vs. Observed (#)
Layer 3	0.325017	0.0126045	0.0192522	0.0211128	0.0559384	0.0539378	0.0715579		Layer 3	0.2439	0.3185	0.3094	0.9677	0.3574	0.333
Layer 2	0.797752	0.0309377	0.0472545	0.0518213	0.137301	0.13239	0.175639		Layer 2	0.3275	0.2992	0.7331	0.8304	0.7332	0.3459
Layer 1	1.33093	0.0516147	0.0788369	0.086456	0.229065	0.220873	0.293026		Layer 1	0.6163	0.5442	0.9791	0.9181	0.6806	0.7863

## Sheet: 5B
	arr UAS-Hop	UAS-dnTCF UAS-Hop	UAS-Hop	axn UAS-Hop	Control	axn/apc		SEM	UAS-dnTCF UAS-Hop	UAS-Hop	axn UAS-Hop	Control	axn/apc
EC	0	0.166667	0.123515	0.295455	0	0		EC	8.7841	1.60358	1.8864	0	0
Layer 3	0	0.25	0.321138	0.434783	0.0815105	0.0282486		Layer 3	4.16667	1.25735	1.32405	0.396339	0.676959
Layer 2	0.125	0.413793	0.398458	0.360656	0.200067	0.047619		Layer 2	4.7392	1.31838	1.39414	0.579479	0.870126
Layer 1	0.416667	0.559322	0.498656	0.384615	0.333781	0.136792		Layer 1	4.77727	1.34644	1.47239	0.683065	1.40403
Avg FSC EdU	0.376812	0.462963	0.438724	0.383178	0.250734	0.0734558
								p value, by location vs. control
n EC	1	18	421	44	1612	649		EC	<0.0001	<0.0001	<0.0001		--
n Layer 3	1	20	246	23	784	177		Layer 3	0.0078	<0.0001	<0.0001		0.0121
n Layer 2	8	29	389	61	1479	210		Layer 2	0.0047	<0.0001	0.0025		<0.0001
n Layer 1	60	59	744	130	2503	212		Layer 1	0.0003	<0.0001	0.23		<0.0001
Total FSCs	69	108	1379	214	4766	599
EdU+ EC	0	3	52	13	0	0
EdU+ L3	0	5	79	10	64	5
EdU+ L2	1	12	155	22	296	10
EdU L1+	25	33	371	50	835	29
Total FSC EdU	26	50	605	82	1195	44
