# Supplementary material for: Opposing JAK-STAT and Wnt signaling gradients define a stem cell domain by regulating differentiation at two borders
Source: eLife. 2020 Nov 2;9:e61204. doi: 10.7554/eLife.61204 (PMC7695452; doi:10.7554/eLife.61204)
Supplement: Figure 6—figure supplement 1—source data 1. [file elife-61204-fig6-figsupp1-data1.xlsx]

## Sheet: 6S1A
	Control	UAS-dnTCF	stat	stat UAS-dnTCF	kibra/wts/UAS-CycE stat	kibra/wts/UAS-CycE stat UAS-dnTCF
FC prob (%)	61.6348	52.8809	34.2005	29.1702	25.3102	11.4838
n value	556	103	84	47	153	128
error	2.06226	4.91846	4.45669	6.63023	3.51506	2.81805
p value		0.0956		0.5567		0.0033
(with vs. without UAS-dnTCF)

## Sheet: 6S1D
	Control	UAS-dnTCF	stat	stat UAS-dnTCF	kibra/wts/UAS-CycE stat	kibra/wts/UAS-CycE stat UAS-dnTCF
Layer 1 %	48.7568	62.9565	3.52941	23.5294	29.6729	36.8632
n	4746	575	85	51	856	1747
Error	0.725558	2.01392	2.00142	5.93974	1.56137	1.15423
p-value		< 0.0001		0.0003		0.0003
(with vs. without UAS-dnTCF)

## Sheet: 6S1E
EC Ratio	Control	stat	stat UAS-dnTCF
EC/FSC 6d	0.55	0.88	0.87
n	1148	175	78
std err 6d	0.00876213	0.0334102	0.0267376
p value (6d)		<0.0001	<0.0001
(vs. control)
EC/FSC 12d	0.63	1.19	1.4
n	1044	68	35
std err 12d	0.0100898	0.136442	0.223798
p value (12d)		<0.0001	<0.0001
(vs. control)

## Sheet: 6S1F
	Control	UAS-dnTCF	stat	stat UAS-dnTCF	kibra/wts/ UAS-CycE stat	kibra/wts/ UAS-CycE stat UAS-dnTCF	kibra UAS-CycE stat	kibra UAS-CycE stat UAS-dnTCF
FSC#	3.28247	3.04233	0.330739	0.476636	2.10837	1.99624	15.8868	16.8846
Avg EdU (%)	25.1	18.8679	2.38095	3.91061	4.94297	16.2205	16	21.6359
% with FSC	62.1306	69.8413	25.2918	32.7103	71.1823	63.1579	94.3396	90.3846
% with FSC and FC	42.8179	46.0317	3.50195	4.6729	9.35961	12.0301	16.9811	26.9231
err FSC#	0.0116376	0.132912	0.066035	0.112723	0.0702571	0.101475	0.376161	0.439347
err Avg EdU	0.626962	1.49056	0.831712	1.44888	0.771698	1.4629	2.31862	2.11508
err % with FSC	1.27164	3.33835	2.71149	4.53549	2.24777	2.95764	3.17418	4.08817
err % FSC FC	1.29721	3.62549	1.14669	2.04037	1.44553	1.99462	5.15744	6.15107
p val for FSC		0.0185		0.06		0.513		0.6711
(With and without dnTCF)
