# Supplementary material for: Opposing JAK-STAT and Wnt signaling gradients define a stem cell domain by regulating differentiation at two borders
Source: eLife. 2020 Nov 2;9:e61204. doi: 10.7554/eLife.61204 (PMC7695452; doi:10.7554/eLife.61204)
Supplement: Figure 6—figure supplement 2—source data 1. [file elife-61204-fig6-figsupp2-data1.xlsx]

## Sheet: 6S2A
	Control	UAS-Hop	axn UAS-Hop
Imm FC (%)	77.263	86.1	94.0375
n	18	12	24
error	9.87907	9.98662	4.83347
p-value		0.2478	0.2162
(vs. control)
