# Supplementary material for: Opposing JAK-STAT and Wnt signaling gradients define a stem cell domain by regulating differentiation at two borders
Source: eLife. 2020 Nov 2;9:e61204. doi: 10.7554/eLife.61204 (PMC7695452; doi:10.7554/eLife.61204)
Supplement: Figure 6—source data 1. [file elife-61204-fig6-data1.xlsx]

## Sheet: 6A
	Control	UAS-Hop	arr	arr UAS-Hop	UAS-dnTCF	UAS-dnTCF UAS-Hop	axn	axn UAS-Hop
FC prob %	61.6348	78.0539	76.9	90.3	52.8809	72.5	22.3923	63.6
n value	556	59	71	15	103	11	67	29
error	2.06226	5.38828	5.00196	7.6416	4.91846	13.4629	5.09289	8.10415
p-value		0.013		0.2478		0.2162		< 0.0001
(genotype with vs. without Hop)

## Sheet: 6D
	Control	UAS-Hop	arr	arr UAS-Hop	UAS-dnTCF	UAS-dnTCF UAS-Hop	axn	axn UAS-Hop
Layer 1 %	48.7568	49.0558	79.3249	87.1287	62.9565	58.125	20.6349	35.323
n	4746	2436	237	69	575	160	189	2446
err	0.725558	1.01287	2.6306	4.05437	2.01392	3.90031	2.94364	0.966441
p value		0.8104		0.1553		0.266		< 0.0001
(with vs. without Hop)

## Sheet: 6E
	Control	UAS-Hop	UAS-dnTCF	UAS-dnTCF UAS-Hop	arr	arr UAS-Hop	axn	axn UAS-Hop
12d EC/Germ	1.30347	3.26957	0.42328	0.695652	0.0649351	0.0666667	8.60504	17.229
12d n	1585	230	189	46	154	45	119	87
12d SEM	0.0162781	0.106663	0.0180532	0.154814	0.00327036	0.0102667	0.199546	1.65476
p val	< 0.0001		0.0014		0.9632		< 0.0001
(with vs. without UAS-Hop)

## Sheet: 6J
	Control	UAS-Hop	arr	arr UAS-Hop	arr UAS-Dap UAS-Hop	UAS-dnTCF	UAS-dnTCF UAS-Hop	axn	axn UAS-Hop
FSC#	3.28247	10.4348	1.53896	0.288889	0.19	3.04233	3.47826	1.46218	28.1149
Avg EdU (%)	24.9685	43.8724	22.5434	37.6812	22.58	18.8679	46.2963	7.07635	28.2
% with FSC	62.1306	75.2174	44.1558	17.7778	11.3208	69.8413	73.913	40.3361	91.954
% with FSC and FC	42.8179	68.6957	37.013	6.66667	7.54717	46.0317	47.8261	12.605	87.3563
stdev FSCs	0.804256	9.45111	2.39316	0.726831	0.04	3.18713	3.60086	2.55047	15.2791
SEM FSC#	0.0116376	0.19292	0.155453	0.201587	0.00549442	0.132912	0.284673	0.193351	0.308937
err Avg EdU	0.626962	1.33629	2.24647	5.83374	4.33558	1.49056	4.79803	1.10657	1.42936
err % with FSC	1.27164	2.84688	4.0015	5.69937	4.35222	3.33835	6.47431	4.49707	2.91619
err % FSC FC	1.29721	3.05776	3.89083	3.71849	3.62839	3.62549	7.36513	3.04258	3.56307
p val for FSC#		< 0.0001		0.0007	< 0.0001		0.4184		< 0.0001
(with vs. without UAS-Hop)
